# Supplementary material for: Endosperm culture-based allotriploid hybrid production from an interspecific cross of Haemanthus spp.: new insights into polyploidization and hybridization
Source: PubMed Central journal article supplement (PMC11800442; doi:10.1186/s12870-025-06181-x), 2025-02-06
Supplement: 12870_2025_6181_MOESM1_ESM.pdf [file 12870_2025_6181_MOESM1_ESM.pdf]

**Table S1.**

Selected sequences of the primer used in this study based on [28] Rønsted *et al.* (2012).

| Primer name | Target                  | Sequence (5'–3')               | Direction | Reference |
|-------------|-------------------------|--------------------------------|-----------|-----------|
| ITS5        | ITS region              | GGA AGT AAA AGT CGT AAC AAG G  | Forward   | [27]      |
| ITS4        | ITS region              | TCC TCC GCT TAT TGA TAT GC     | Reverse   | [27]      |
| trnC        | <i>trnL-trnF</i> region | CGA AAT CGG TAG ACG CTA CG     | Forward   | [33]      |
| trnF        | <i>trnL-trnF</i> region | ATT TGA ACT GGT GAC ACG AG     | Reverse   | [33]      |
| 19F         | <i>matK</i> gene        | CGT TCT GAC CAT ATT GCA CTA TG | Forward   | [31]      |
| 2R          | <i>matK</i> gene        | AAC TAG TCG GAT GGA GTA G      | Reverse   | [32]      |
| KatF*       | <i>matK</i> gene        | ATC GGG CCA TCC TAT TAG        | Forward   | [35]      |
| 1326R*      | <i>matK</i> gene        | TCT AGC ACA CGA AAG TCG AAG T  | Reverse   | [36]      |
| nad1eB      | <i>nadl</i> gene        | GCA TTA CGA TCT GCA GCT CA     | Forward   | [34]      |
| nad1eCR     | <i>nadl</i> gene        | GGA GCT CGA TTA GTT TCT GC     | Reverse   | [34]      |
| nad1iB2*    | <i>nadl</i> gene        | GTC GAG CAT ACG ACG ATG CCG C  | Forward   | [37]      |
| nad1iB2R*   | <i>nadl</i> gene        | GGC GGC ATC GTC GTA TGC TCG    | Reverse   | [37]      |

\* Primers used for Sanger sequencing.

#### References

- [27] White TJ, Bruns T, Lee S, Taylor J. Amplification and direct sequencing of fungal ribosomal RNA genes for phylogenetics. In: Innis MA, Gelfand DH, Sninsky JJ, White TJ, ed. PCR protocols. San Diego, CA, USA: Academic Press, 1990; 315-322.
- [28] Rønsted N, Symonds MRE, Birkholm T, Christensen SB, Meerow AW, Molander M, Mølgaard P, Petersen G, Rasmussen N, van Staden J, Stafford GI, Jäger AK. Can phylogeny predict chemical diversity and potential medicinal activity of plants? A case study of Amaryllidaceae. *BMC Evol. Biol.* 2012; 12: 182.

- [31] Kores PJ, Weston PH, Molvray M, Chase MW. Phylogenetic relationships within the Diurideae (Orchidaceae): inferences from plastid *matK* DNA sequences. In: Wilson KL, Morrison DA, ed. Monocots. Systematics & evolution. Collingwood, Victoria, Australia: CSIRO Publishing, 2000; 449-456.
- [32] Johnson LA, Soltis DE. *matK* DNA sequences and phylogenetic reconstruction in Saxifragaceae s. str. Syst. Bot. 1994; 19: 143-156.
- [33] Taberlet P, Gielly L, Pautou G, Bouvet J. Universal primers for amplification of three non-coding regions of chloroplast DNA. Plant Mol. Biol. 1991; 17: 1105-1109.
- [34] Demesure B, Sodzi N, Petit RJ. A set of universal primers for amplification of polymorphic non-coding regions of mitochondrial and chloroplast DNA in plants. Mol. Ecol. 1995; 4: 129-131.
- [35] Larsen MM, Adsersen A, Davis AP, Lledó MD, Jäger AK, Rønsted N. Using a phylogenetic approach to selection of target plants in drug discovery of acetylcholinesterase inhibiting alkaloids in Amaryllidaceae tribe Galantheae. Biochem. Syst. Ecol. 2010; 38: 1026-1034.
- [36] Sun H, McLewin W, Fay MF. Molecular phylogeny of *Helleborus* (*Ranunculaceae*), with an emphasis on the East Asian-Mediterranean disjunction. Taxon 2001; 50: 1001-1018.
- [37] Cuenca A, Petersen G, Seberg O, Jahren AH. Genes and processed paralogs co-exist in plant mitochondria. J. Mol. Evol. 2012; 74: 158-169.
