# Supplementary material for: Endosperm culture-based allotriploid hybrid production from an interspecific cross of Haemanthus spp.: new insights into polyploidization and hybridization
Source: PubMed Central journal article supplement (PMC11800442; doi:10.1186/s12870-025-06181-x), 2025-02-06
Supplement: 12870_2025_6181_MOESM2_ESM.pdf [file 12870_2025_6181_MOESM2_ESM.pdf]

**Table S2**

Accession numbers of DNA sequences from previous studies.

| NCBI accession number | Target                  | Species                                          |
|-----------------------|-------------------------|--------------------------------------------------|
| AY280356              | ITS region              | <i>Haemanthus albiflos</i>                       |
| HM140803              | ITS region              | <i>Haemanthus albiflos</i>                       |
| HM140808              | ITS region              | <i>Haemanthus humilis</i> subsp. <i>hirsutus</i> |
| HM140811              | ITS region              | <i>Haemanthus sanguineus</i>                     |
| JX464554              | <i>matK</i> gene        | <i>Haemanthus amarylloides</i>                   |
| JX464555              | <i>matK</i> gene        | <i>Haemanthus coccineus</i>                      |
| JX903563              | <i>matK</i> gene        | <i>Haemanthus albiflos</i>                       |
| AY278966              | <i>trnL-trnF</i> region | <i>Haemanthus albiflos</i>                       |
| AY278980              | <i>trnL-trnF</i> region | <i>Haemanthus albiflos</i>                       |
| EU523831              | <i>trnL-trnF</i> region | <i>Haemanthus albiflos</i>                       |
| EU523832              | <i>trnL-trnF</i> region | <i>Haemanthus albiflos</i>                       |
| EU523839              | <i>trnL-trnF</i> region | <i>Haemanthus pauculifolius</i>                  |
| JX464449              | <i>nad1</i> gene        | <i>Haemanthus amarylloides</i>                   |
| JX464450              | <i>nad1</i> gene        | <i>Haemanthus coccineus</i>                      |
| JX464451              | <i>nad1</i> gene        | <i>Haemanthus humilis</i> subsp. <i>hirsutus</i> |
| JX464452              | <i>nad1</i> gene        | <i>Haemanthus montanus</i>                       |
| JX464453              | <i>nad1</i> gene        | <i>Haemanthus sanguineus</i>                     |
