# Supplementary material for: Endosperm culture-based allotriploid hybrid production from an interspecific cross of Haemanthus spp.: new insights into polyploidization and hybridization
Source: PubMed Central journal article supplement (PMC11800442; doi:10.1186/s12870-025-06181-x), 2025-02-06
Supplement: 12870_2025_6181_MOESM3_ESM.pdf [file 12870_2025_6181_MOESM3_ESM.pdf]

**Table S3**

Callus formation and shoot and plantlet regeneration in the culture of the endosperm from the interspecific cross between *Haemanthus paucifolius* and *H. albiflos*.

| Sample ID | CIM: MS supplemented with 5 mg L <sup>-1</sup> Picloram + 5 mg L <sup>-1</sup> BAP |                  |      |      |        |                               |    |          |       | CIM: MS supplemented with 5 mg L <sup>-1</sup> 2,4-D + 5 mg L <sup>-1</sup> BAP |                  |      |      |        |                               |    |          |       | Endosperm produced plantlet |
|-----------|------------------------------------------------------------------------------------|------------------|------|------|--------|-------------------------------|----|----------|-------|---------------------------------------------------------------------------------|------------------|------|------|--------|-------------------------------|----|----------|-------|-----------------------------|
|           | No. of explants                                                                    | Callus induction |      |      |        | Shoot regeneration on the SIM |    |          |       | No. of explants                                                                 | Callus induction |      |      |        | Shoot regeneration on the SIM |    |          |       |                             |
|           |                                                                                    | 4WAC             | 8WAC | Last | Callus | 1/2MS                         | MS | MS + PGR | Shoot |                                                                                 | 4WAC             | 8WAC | Last | Callus | 1/2MS                         | MS | MS + PGR | Shoot |                             |
| EN1-1     | 4                                                                                  | 0                | 4    | 4    | ✓      | ✓                             | ✓  | ✓        | ✓     | 4                                                                               | 0                | 3    | 3    | ✓      |                               |    |          |       | ✓                           |
| EN1-2     | 4                                                                                  | 0                | 4    | 4    | ✓      |                               |    | ✓        | ✓     | 4                                                                               | 0                | 1    | 1    | ✓      |                               |    |          |       | ✓                           |
| EN2-1     | 4                                                                                  | 0                | 3    | 3    | ✓      | ✓                             | ✓  | ✓        | ✓     | 4                                                                               | 0                | 0    | 0    |        |                               |    |          |       | ✓                           |
| EN2-2     | 4                                                                                  | 0                | 2    | 2    | ✓      | ✓                             |    | ✓        | ✓     | 4                                                                               | 0                | 0    | 4    | ✓      |                               |    |          |       | ✓                           |
| EN2-3     | 3                                                                                  | 0                | 0    | 0    |        |                               |    |          |       | 4                                                                               | 0                | 0    | 0    |        |                               |    |          |       |                             |
| EN3-1     | 4                                                                                  | 0                | 2    | 2    | ✓      | ✓                             |    | ✓        | ✓     | 4                                                                               | 1                | 2    | 4    | ✓      |                               |    |          |       | ✓                           |
| EN3-2     | 4                                                                                  | 0                | 4    | 4    | ✓      | ✓                             |    | ✓        | ✓     | 4                                                                               | 0                | 4    | 4    | ✓      | ✓                             |    | ✓        | ✓     | ✓                           |
| EN4-1     | 4                                                                                  | 2                | 3    | 4    | ✓      | ✓                             | ✓  | ✓        | ✓     | 4                                                                               | 0                | 4    | 4    | ✓      | ✓                             | ✓  | ✓        | ✓     | ✓                           |
| EN4-2     | 4                                                                                  | 2                | 2    | 2    | ✓      |                               | ✓  | ✓        | ✓     | 4                                                                               | 1                | 2    | 2    | ✓      |                               |    |          |       | ✓                           |
| EN5-1     | 4                                                                                  | 3                | 4    | 4    | ✓      | ✓                             | ✓  | ✓        | ✓     | 4                                                                               | 0                | 3    | 4    | ✓      | ✓                             | ✓  | ✓        | ✓     | ✓                           |
| EN6-1     | 4                                                                                  | 1                | 2    | 4    | ✓      |                               | ✓  | ✓        | ✓     | 4                                                                               | 3                | 0    | 0    |        |                               |    |          |       | ✓                           |
| EN7-1     | 4                                                                                  | 2                | 4    | 4    | ✓      |                               |    | ✓        | ✓     | 4                                                                               | 0                | 4    | 4    | ✓      | ✓                             | ✓  | ✓        | ✓     | ✓                           |
| EN7-2     | 4                                                                                  | 0                | 2    | 4    | ✓      |                               | ✓  | ✓        | ✓     | 4                                                                               | 2                | 0    | 0    |        |                               |    |          |       | ✓                           |
| EN8-1     | 4                                                                                  | 2                | 3    | 4    | ✓      | ✓                             | ✓  | ✓        | ✓     | 4                                                                               | 0                | 0    | 0    |        |                               |    |          |       | ✓                           |
| EN9-1     | 4                                                                                  | 0                | 2    | 2    | ✓      | ✓                             | ✓  | ✓        | ✓     | 4                                                                               | 0                | 0    | 1    | ✓      |                               |    |          |       | ✓                           |
| EN9-2     | 4                                                                                  | 0                | 4    | 4    | ✓      | ✓                             | ✓  | ✓        | ✓     | 4                                                                               | 0                | 0    | 4    | ✓      |                               |    |          |       | ✓                           |
| EN10-1    | 4                                                                                  | 0                | 0    | 0    |        |                               |    |          |       | 4                                                                               | 0                | 0    | 0    |        |                               |    |          |       |                             |
| EN10-2    | 3                                                                                  | 0                | 0    | 0    |        |                               |    |          |       | 3                                                                               | 0                | 0    | 0    |        |                               |    |          |       |                             |
| EN10-3    | 4                                                                                  | 0                | 0    | 0    |        |                               |    |          |       | 4                                                                               | 0                | 0    | 0    |        |                               |    |          |       |                             |
| EN11-1    | 4                                                                                  | 1                | 4    | 4    | ✓      | ✓                             | ✓  | ✓        | ✓     | 4                                                                               | 0                | 4    | 4    | ✓      |                               | ✓  |          | ✓     | ✓                           |
| EN11-2    | 4                                                                                  | 0                | 4    | 4    | ✓      |                               | ✓  | ✓        | ✓     | 4                                                                               | 0                | 1    | 4    | ✓      | ✓                             | ✓  | ✓        | ✓     | ✓                           |
| EN12-1    | 4                                                                                  | 3                | 3    | 4    | ✓      | ✓                             | ✓  | ✓        | ✓     | 4                                                                               | 3                | 3    | 3    | ✓      | ✓                             | ✓  | ✓        | ✓     | ✓                           |
| 22        | 86                                                                                 | 16               | 56   | 63   | 18     | 12                            | 13 | 17       | 18    | 87                                                                              | 10               | 31   | 46   | 14     | 6                             | 6  | 6        | 7     | 18                          |

CIM: Callus induction medium, SIM: Shoot induction medium, PGR: Plant growth regulators (NAA + BAP), WAC: weeks after culture.
