# Supplementary material for: Endosperm culture-based allotriploid hybrid production from an interspecific cross of Haemanthus spp.: new insights into polyploidization and hybridization
Source: PubMed Central journal article supplement (PMC11800442; doi:10.1186/s12870-025-06181-x), 2025-02-06
Supplement: 12870_2025_6181_MOESM4_ESM.pdf [file 12870_2025_6181_MOESM4_ESM.pdf]

**Table S4**

The SNPs of ITS region in *Haemanthus pauculifolius*, *H. albiflos*, embryo-derived plantlets, and endosperm-derived plantlets from the same seeds.

| Embryo-derived plantlet (EM) |      |      |           |      |        | Endosperm-derived plantlet (EN) |      |      |           |      |        |             |
|------------------------------|------|------|-----------|------|--------|---------------------------------|------|------|-----------|------|--------|-------------|
| Sample ID                    | ITS1 |      | 5.8S rRNA |      | Hybrid | Sample ID                       | ITS1 |      | 5.8S rRNA |      | Hybrid | Hybrid seed |
|                              | ITS5 | ITS4 | ITS5      | ITS4 |        |                                 | ITS5 | ITS4 | ITS5      | ITS4 |        |             |
| <i>H. pauculifolius</i>      | Y    | Y    | G         | G    |        | <i>H. pauculifolius</i>         | Y    | Y    | G         | G    |        |             |
| <i>H. albiflos</i>           | C    | C    | R         | R    |        | <i>H. albiflos</i>              | C    | C    | R         | R    |        |             |
| EM1-1                        | Y    | Y    | R         | R    | ✓      | EN1-1                           | Y    | Y    | G         | G    |        | ✓           |
| EM1-2                        | Y    | Y    | G         | G    |        |                                 |      |      |           |      |        |             |
| EM2-1                        | Y    | Y    | G         | G    |        | EN2-1                           | Y    | Y    | G         | G    |        |             |
| EM2-2                        | Y    | Y    | G         | G    |        | EN2-2                           | Y    | Y    | G         | G    |        |             |
| EM2-3                        | Y    | Y    | G         | G    |        |                                 |      |      |           |      |        |             |
| EM3-1                        | Y    | Y    | R         | R    | ✓      | EN3-1                           | Y    | Y    | G         | R    | ✓      | ✓           |
| EM3-2                        | Y    | Y    | R         | R    | ✓      | EN3-2                           | Y    | Y    | R         | R    | ✓      | ✓           |
| EM4-1                        | Y    | Y    | R         | R    | ✓      | EN4-1                           | Y    | Y    | G         | G    |        | ✓           |
| EM4-2                        | Y    | Y    | G         | G    |        | EN4-2                           | Y    | Y    | G         | G    |        |             |
| EM5-1                        | Y    | Y    | G         | G    |        | EN5-1                           | Y    | Y    | G         | G    |        |             |
| EM6-1                        | Y    | Y    | R         | R    | ✓      | EN6-1                           | Y    | Y    | G         | R    | ✓      | ✓           |
| EM7-1                        | Y    | Y    | G         | G    |        | EN7-1                           | Y    | Y    | G         | G    |        |             |
| EM7-2                        | Y    | Y    | G         | G    |        | EN7-2                           | Y    | Y    | G         | G    |        |             |
| EM8-1                        | Y    | Y    | R         | R    | ✓      | EN8-1                           | Y    | Y    | G         | R    | ✓      | ✓           |
| EM9-1                        | Y    | Y    | G         | G    |        | EN9-1                           | Y    | Y    | G         | G    |        |             |
| EM9-2                        | Y    | Y    | G         | G    |        | EN9-2                           | Y    | Y    | G         | G    |        |             |
| EM10-1                       | Y    | Y    | R         | R    | ✓      |                                 |      |      |           |      |        | ✓           |
| EM10-2                       | Y    | Y    | G         | G    |        |                                 |      |      |           |      |        |             |
| EM11-1                       | Y    | Y    | G         | G    |        | EN11-1                          | Y    | Y    | G         | G    |        |             |
| EM11-2                       | Y    | Y    | R         | R    | ✓      |                                 |      |      |           |      |        | ✓           |
| EM12-1                       | Y    | Y    | G         | G    |        | EN12-1                          | Y    | Y    | G         | G    |        |             |
| Total                        |      |      |           |      | 8      |                                 |      |      |           |      | 4      | 8           |

“Y” (T + C) and “R” (A + G) mean that one-base substitutions in the same individual were detected from two overlapping peaks.
