# Supplementary material for: Endosperm culture-based allotriploid hybrid production from an interspecific cross of Haemanthus spp.: new insights into polyploidization and hybridization
Source: PubMed Central journal article supplement (PMC11800442; doi:10.1186/s12870-025-06181-x), 2025-02-06
Supplement: 12870_2025_6181_MOESM5_ESM.pdf [file 12870_2025_6181_MOESM5_ESM.pdf]

## ITS (Embryo-derived plantlets)

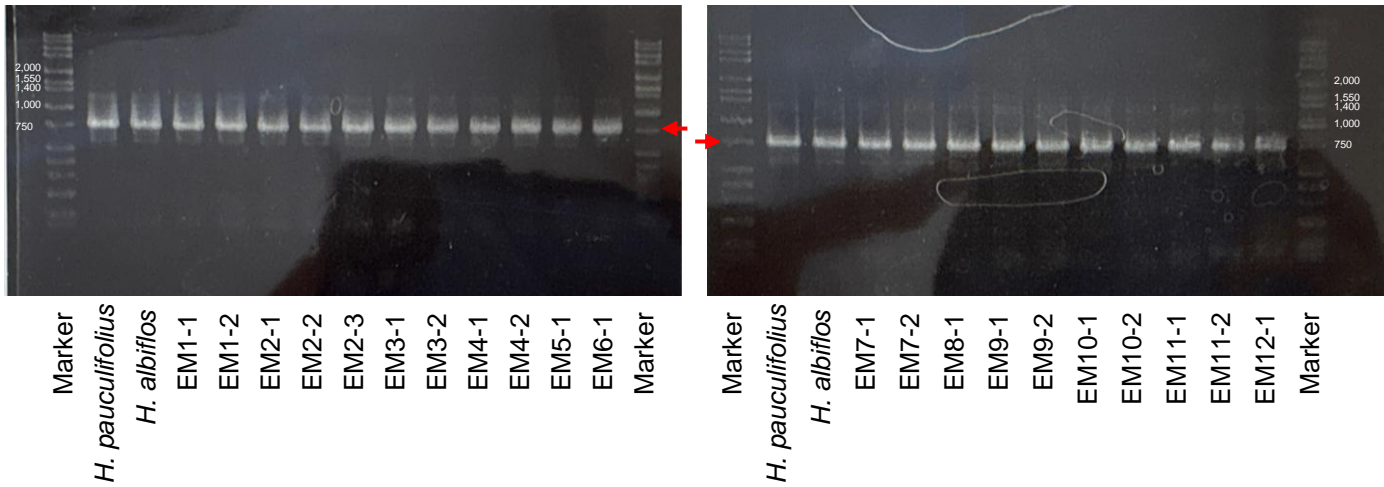

## ITS (Endosperm-derived plantlets)

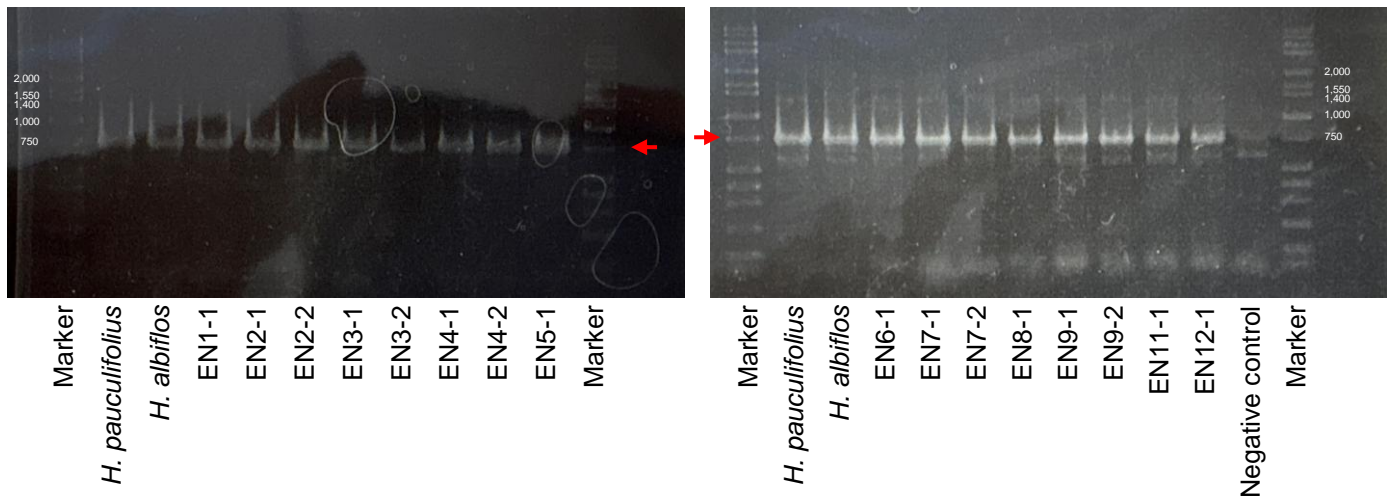

Fig. S1

Electrophoresis images showing the amplification of the ITS region in *Haemanthus paucifolius*, *H. albiflos*, and embryo- and endosperm-derived plantlets.

The ITS regions were amplified using the forward primer ITS5 and the reverse primer ITS4. The marker used was the Wide-Range DNA Ladder (50–10,000 bp; Takara Bio, Shiga, Japan). Arrows indicate the target DNA bands.
