# Supplementary material for: Endosperm culture-based allotriploid hybrid production from an interspecific cross of Haemanthus spp.: new insights into polyploidization and hybridization
Source: PubMed Central journal article supplement (PMC11800442; doi:10.1186/s12870-025-06181-x), 2025-02-06
Supplement: 12870_2025_6181_MOESM7_ESM.pdf [file 12870_2025_6181_MOESM7_ESM.pdf]

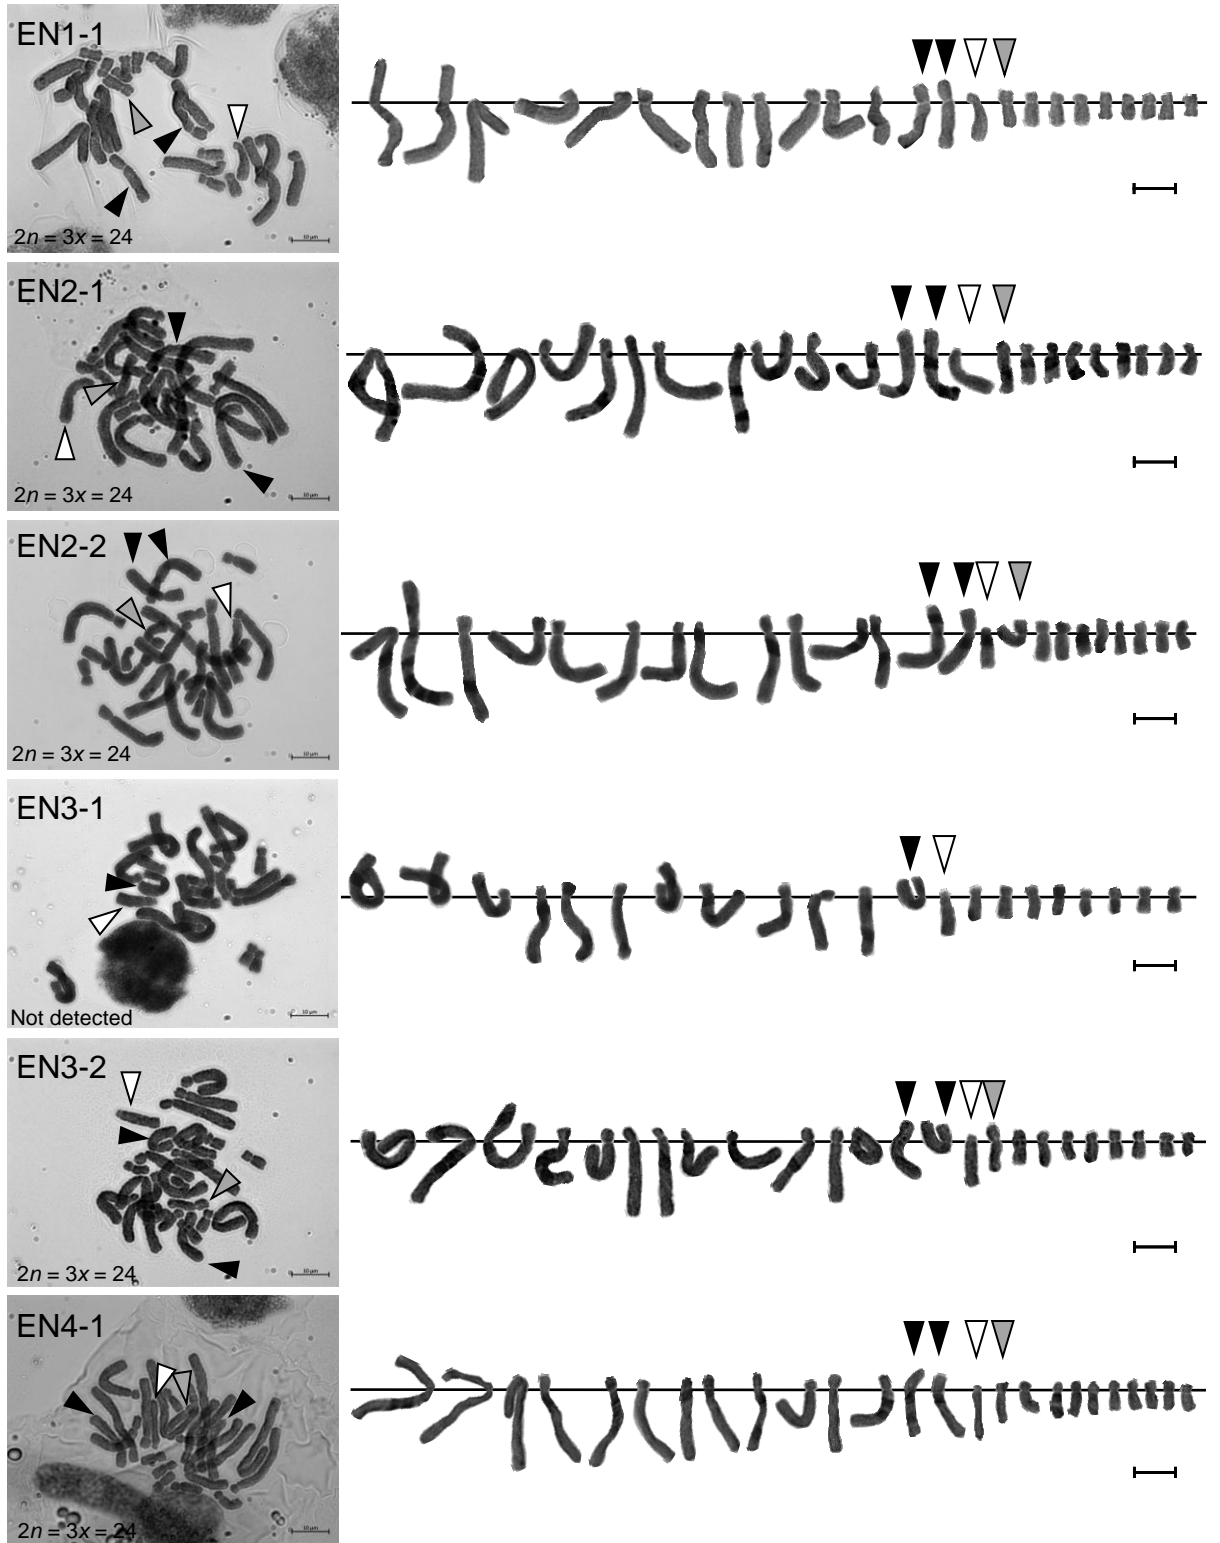

Fig. S3  
 Representative chromosome images and karyograms of 16 endosperm-derived plantlets from each seed. Each arrowhead means the characteristic chromosome of *H. paucifolius* (black) and *H. albiflos* (white and gray). Scale bars = 10  $\mu$ m.

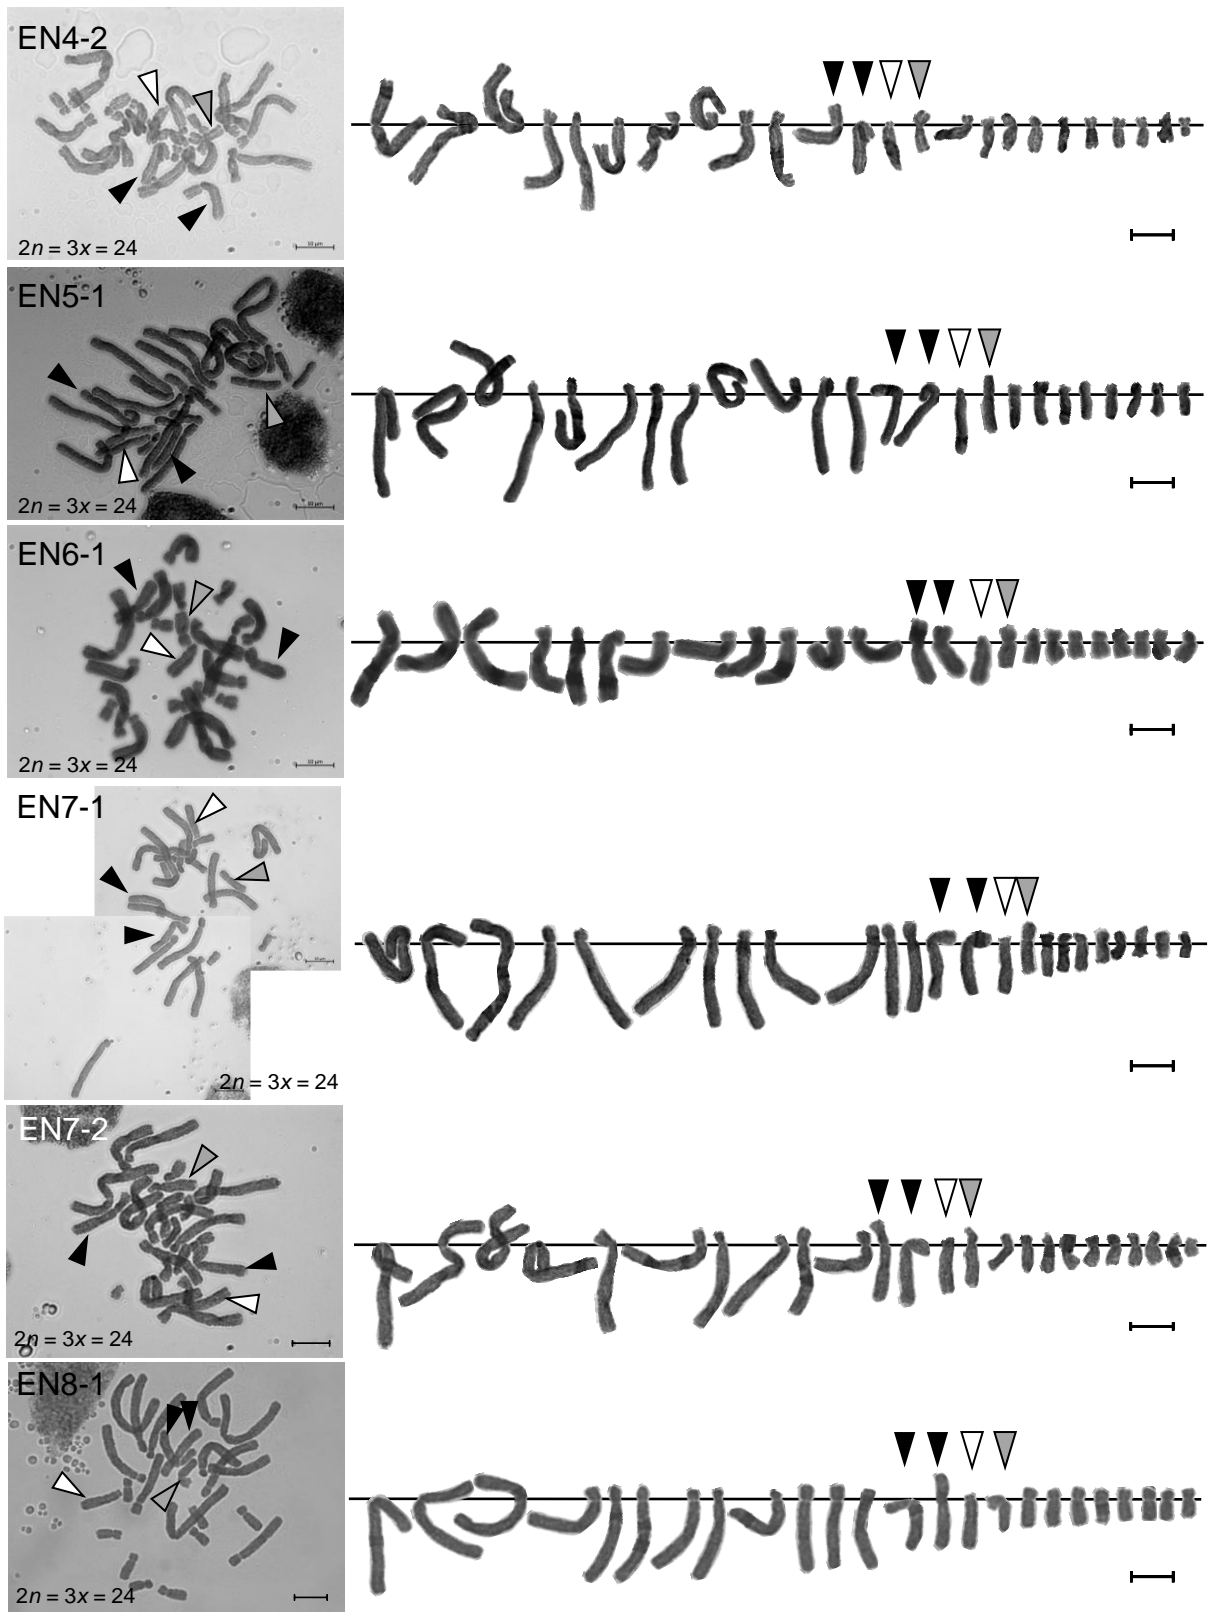

Fig. S3 Cont.

Representative chromosome images and karyograms of 16 endosperm-derived plantlets from each seed. Each arrowhead means the characteristic chromosome of *H. paucifolius* (black) and *H. albiflos* (white and gray). Scale bars = 10  $\mu$ m.

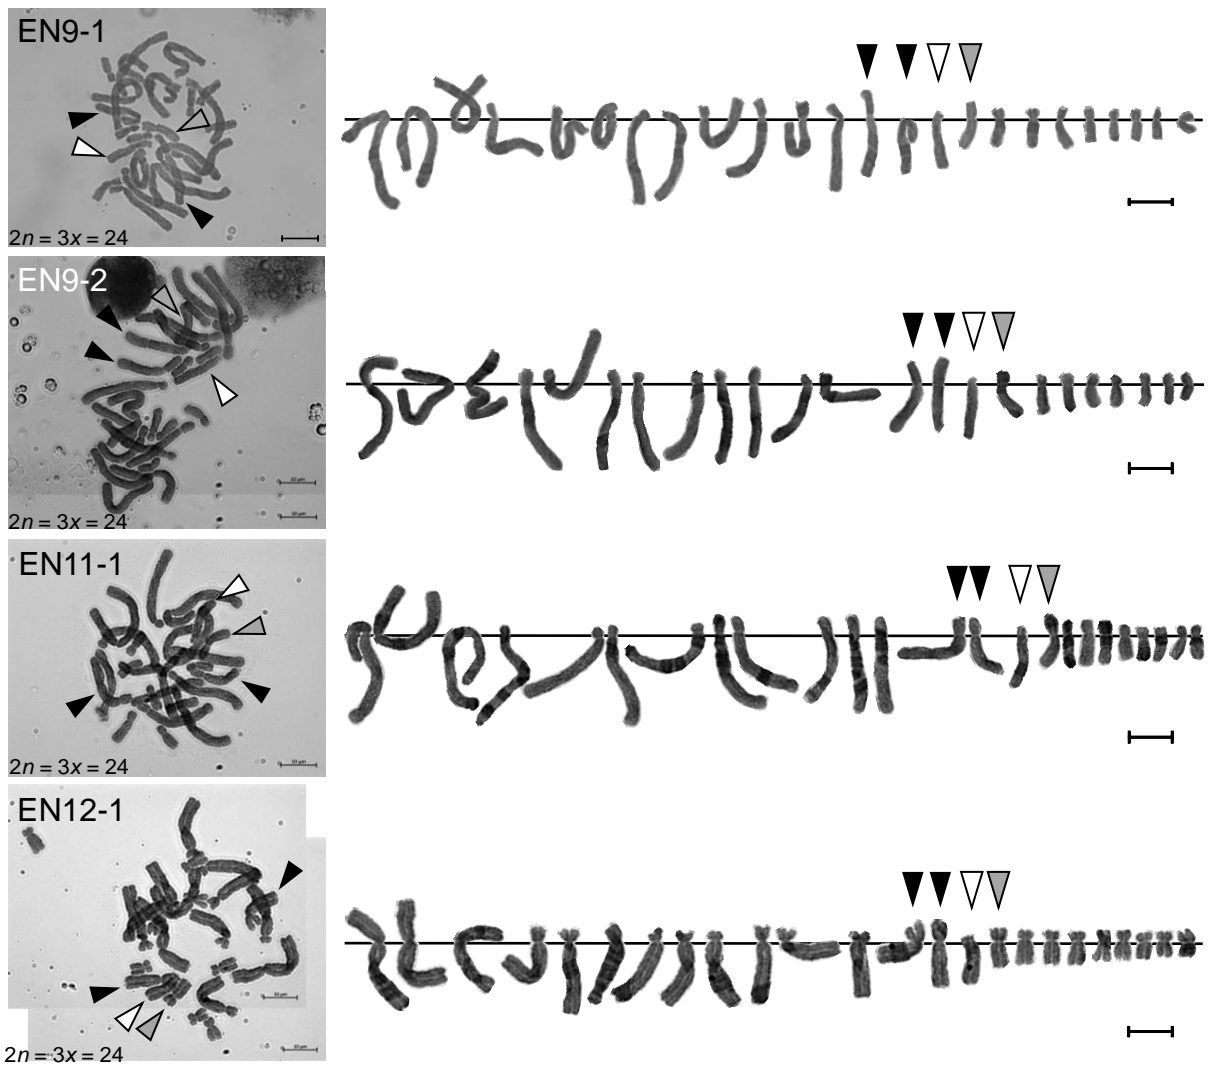

Fig. S3 Cont.  
 Representative chromosome images and karyograms of 16 endosperm-derived plantlets from each seed. Each arrowhead means the characteristic chromosome of *H. paucifolius* (black) and *H. albiflos* (white and gray). Scale bars = 10  $\mu$ m.
