# Supplementary material for: Endosperm culture-based allotriploid hybrid production from an interspecific cross of Haemanthus spp.: new insights into polyploidization and hybridization
Source: PubMed Central journal article supplement (PMC11800442; doi:10.1186/s12870-025-06181-x), 2025-02-06
Supplement: 12870_2025_6181_MOESM8_ESM.pdf [file 12870_2025_6181_MOESM8_ESM.pdf]

## *trnL-trnF*

Primer  
Forward: trnC  
Reverse: trnF

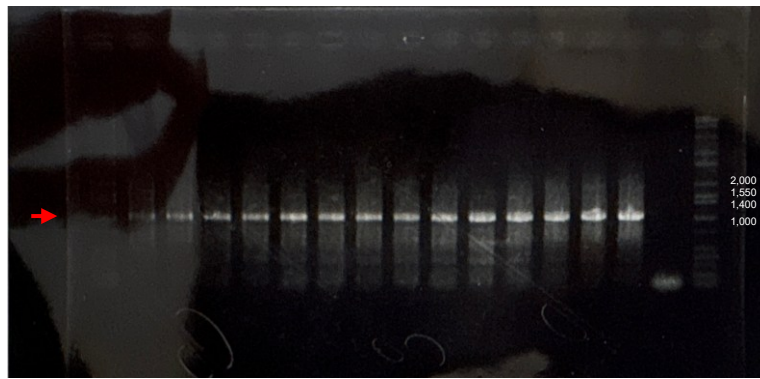

Marker  
*H. pauculifolius*  
*H. albiflos*  
EM6-1  
EM8-1  
EM1-1  
EM4-1  
EM7-2  
EM11-1  
EN6-1  
EN8-1  
EN1-1  
EN4-1  
EN7-2  
EN11-1  
Negative control  
Marker

## *matK*

Primer  
Forward: 19F  
Reverse: 2R

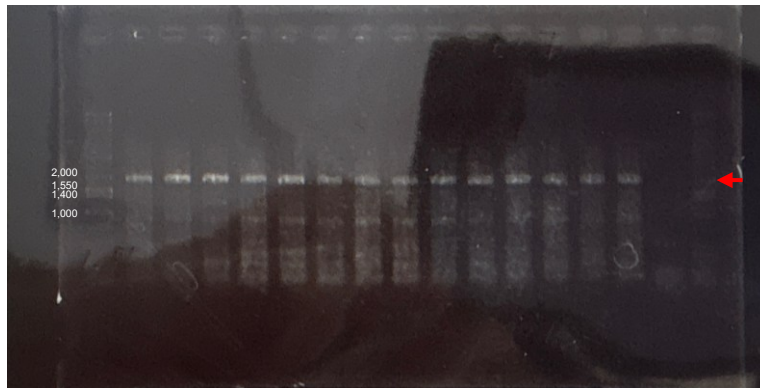

Marker  
*H. pauculifolius*  
*H. albiflos*  
EM6-1  
EM8-1  
EM1-1  
EM4-1  
EM7-2  
EM11-1  
EN6-1  
EN8-1  
EN1-1  
EN4-1  
EN7-2  
EN11-1  
Negative control  
Marker

## *nad1*

Primer  
Forward: nad1eB  
Reverse: nad1eCR

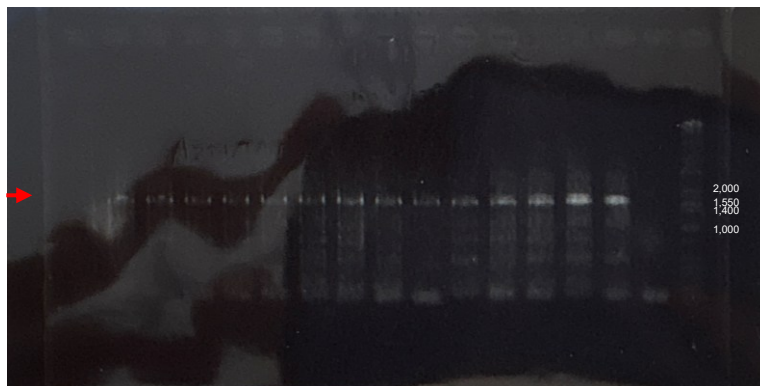

Marker  
*H. pauculifolius*  
*H. albiflos*  
EM6-1  
EM8-1  
EM1-1  
EM4-1  
EM7-2  
EM11-1  
EN6-1  
EN8-1  
EN1-1  
EN4-1  
EN7-2  
EN11-1  
Negative control  
Marker

Fig. S4

Electrophoresis images showing the amplification of the *trnL-trnF* region, *matK* gene, and *nad1* gene in *Haemanthus pauculifolius*, *H. albiflos*, and embryo- and endosperm-derived plantlets.

The marker used was the Wide-Range DNA Ladder (50–10,000 bp). Arrows indicate the target DNA bands.
